# Supplementary material for: Do surface lateral flows matter for data assimilation of soil moisture observations into hyperresolution land models?
Source: Copernicus journal article supplement (doi:10.5194/hess-24-3881-2020), 2020-08-04
Supplement: Supplementary file 1 [file hess-24-3881-2020-supplement.pdf]

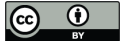

## *Supplement of*

# **Do surface lateral flows matter for data assimilation of soil moisture observations into hyperresolution land models?**

**Yohei Sawada**

*Correspondence to:* Yohei Sawada ([yohei.sawada@sogo.t.u-tokyo.ac.jp](mailto:yohei.sawada@sogo.t.u-tokyo.ac.jp))

The copyright of individual parts of the supplement might differ from the CC BY 4.0 License.

## Supplement material

### **Contents of this file**

Figures S1 to S7

### **Introduction**

This supporting information provides the figures which support the findings shown in the main article.

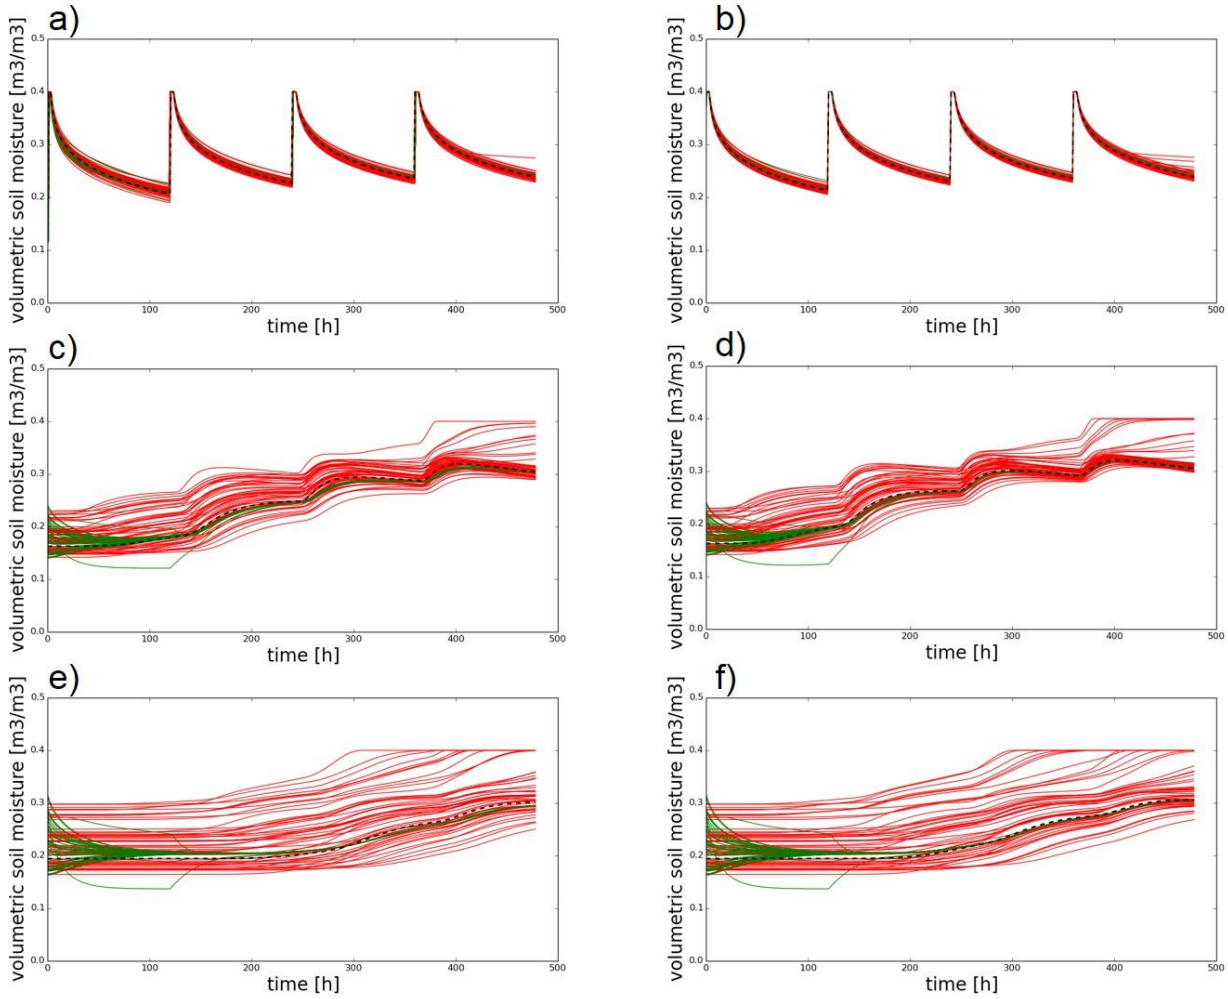

**Figure S1.** Time series of volumetric soil moisture simulated by the synthetic reference run (black dashed line), the NoDA experiment (red lines), and the DA experiment (green lines) in the LOW\_K-UP\_O experiment at a)  $x=1500\text{m}$ ,  $z=0.05\text{m}$ ; (b)  $x=2500\text{m}$ ,  $z=0.05\text{m}$ ; (c)  $x=1500\text{m}$ ,  $z=1.0\text{m}$ ; (d)  $x=2500\text{m}$ ,  $z=1.0\text{m}$ ; (e)  $x=1500\text{m}$ ,  $z=1.5\text{m}$ ; (f)  $x=2500\text{m}$ ,  $z=1.5\text{m}$ . . In the DA experiment, initial guesses are used for this figure.

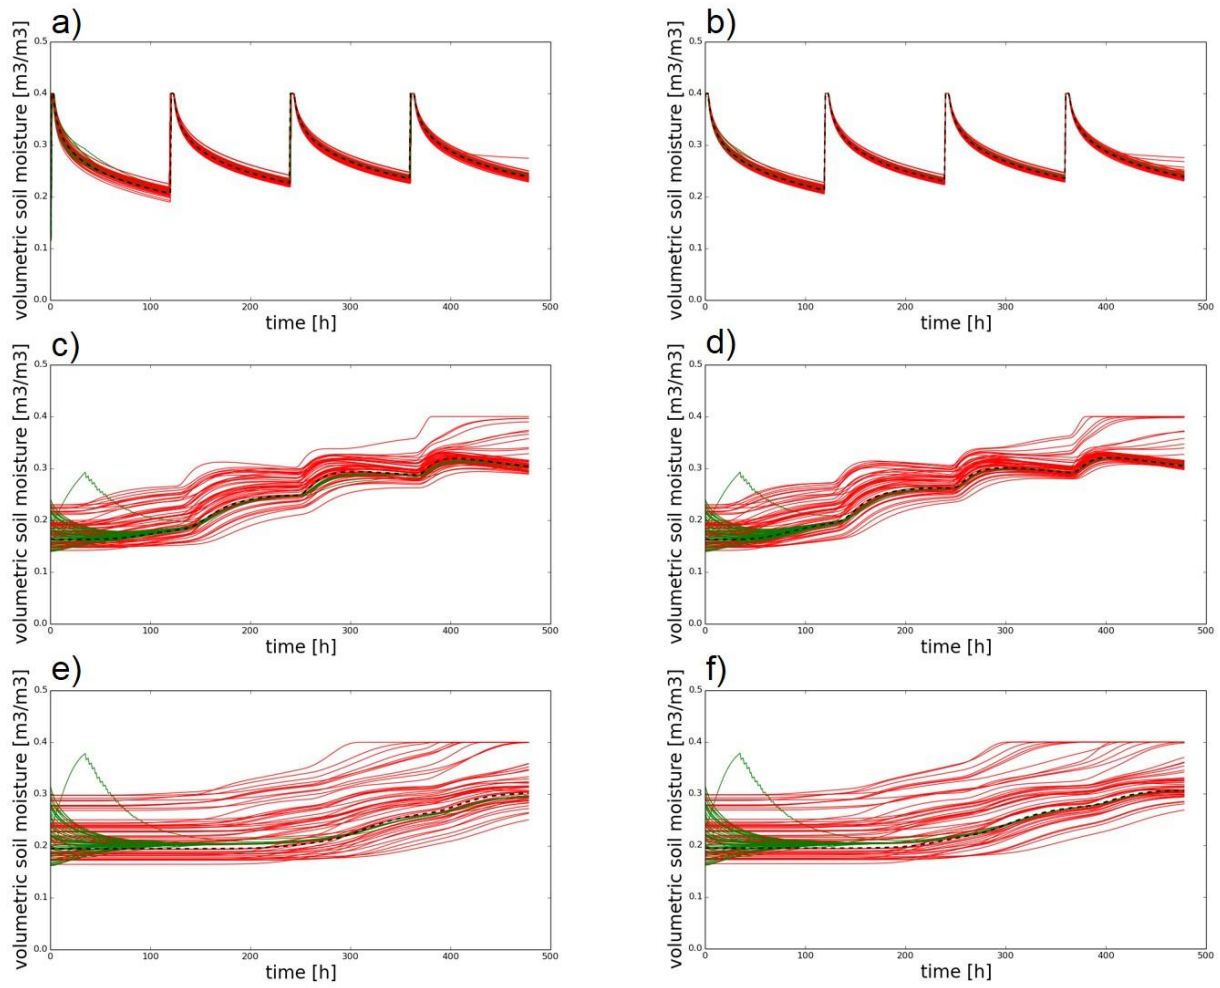

**Figure S2.** Same as Figure S1 but for the LOW\_K-DOWN\_O experiment.

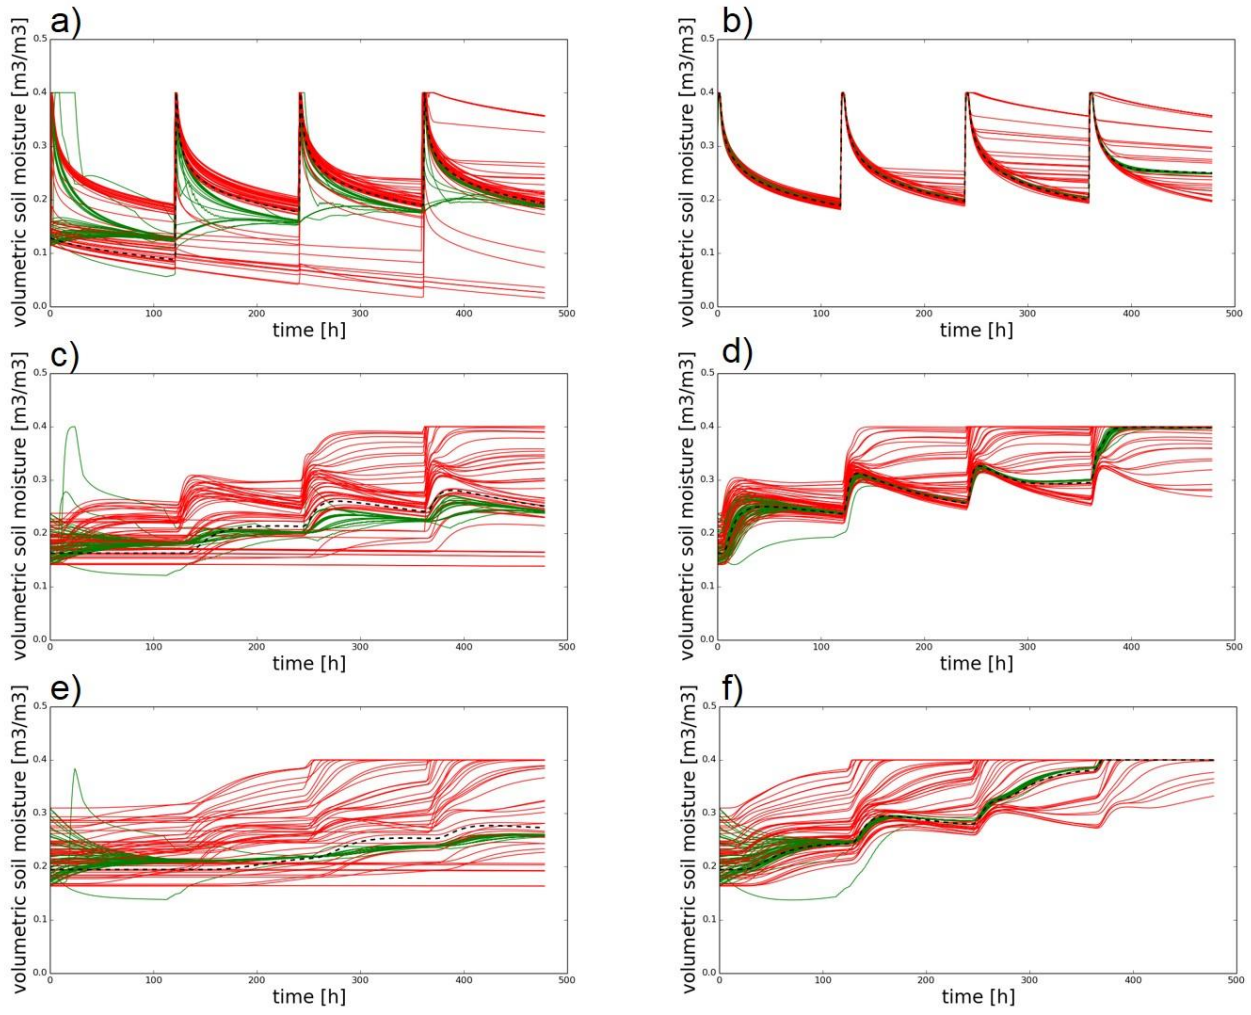

**Figure S3.** Same as Figure S1 but for the HIGH\_K-UP\_O experiment.

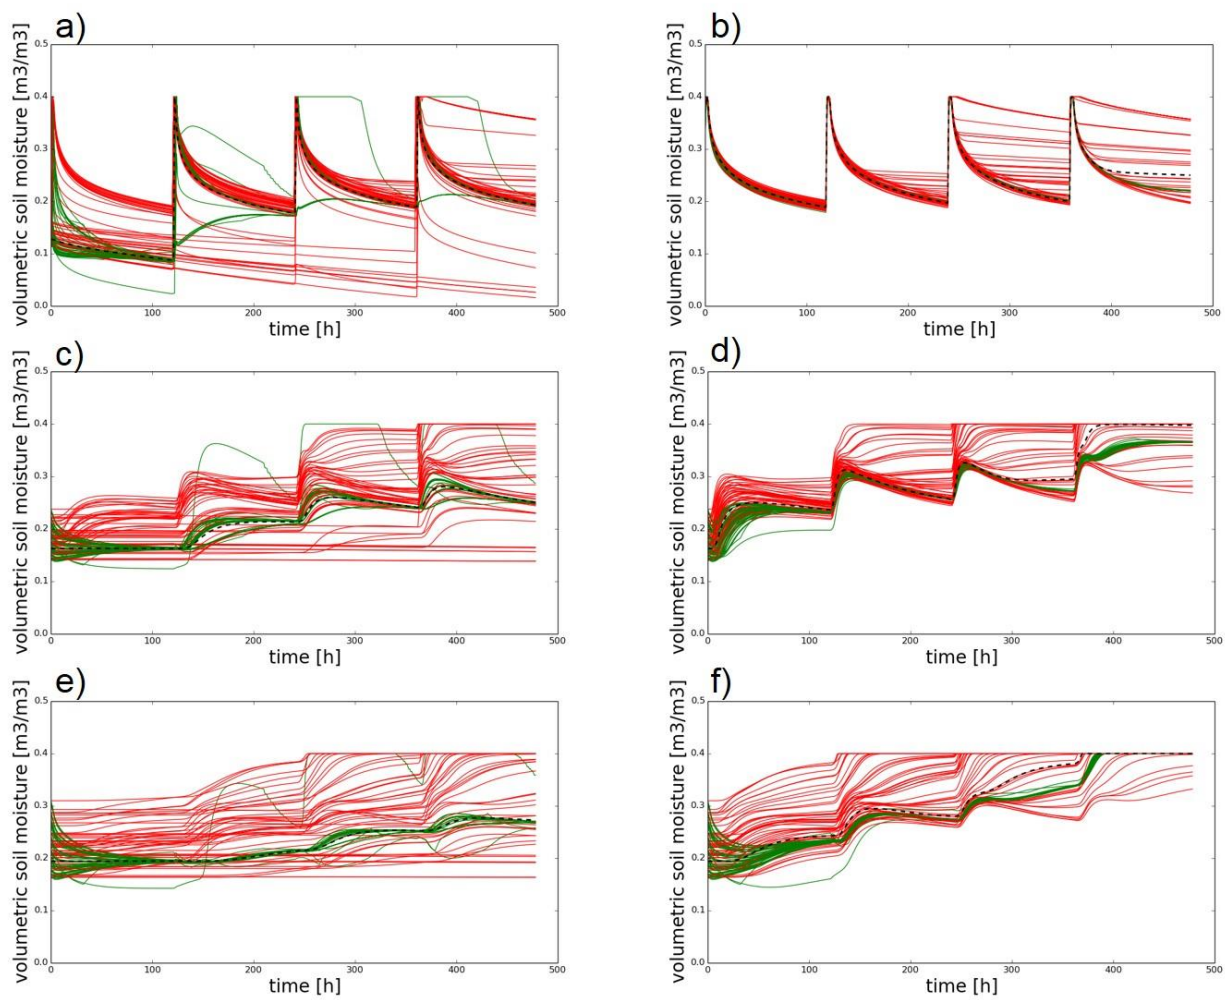

**Figure S4.** Same as Figure S1 but for the HIGH\_K-DOWN\_O experiment.

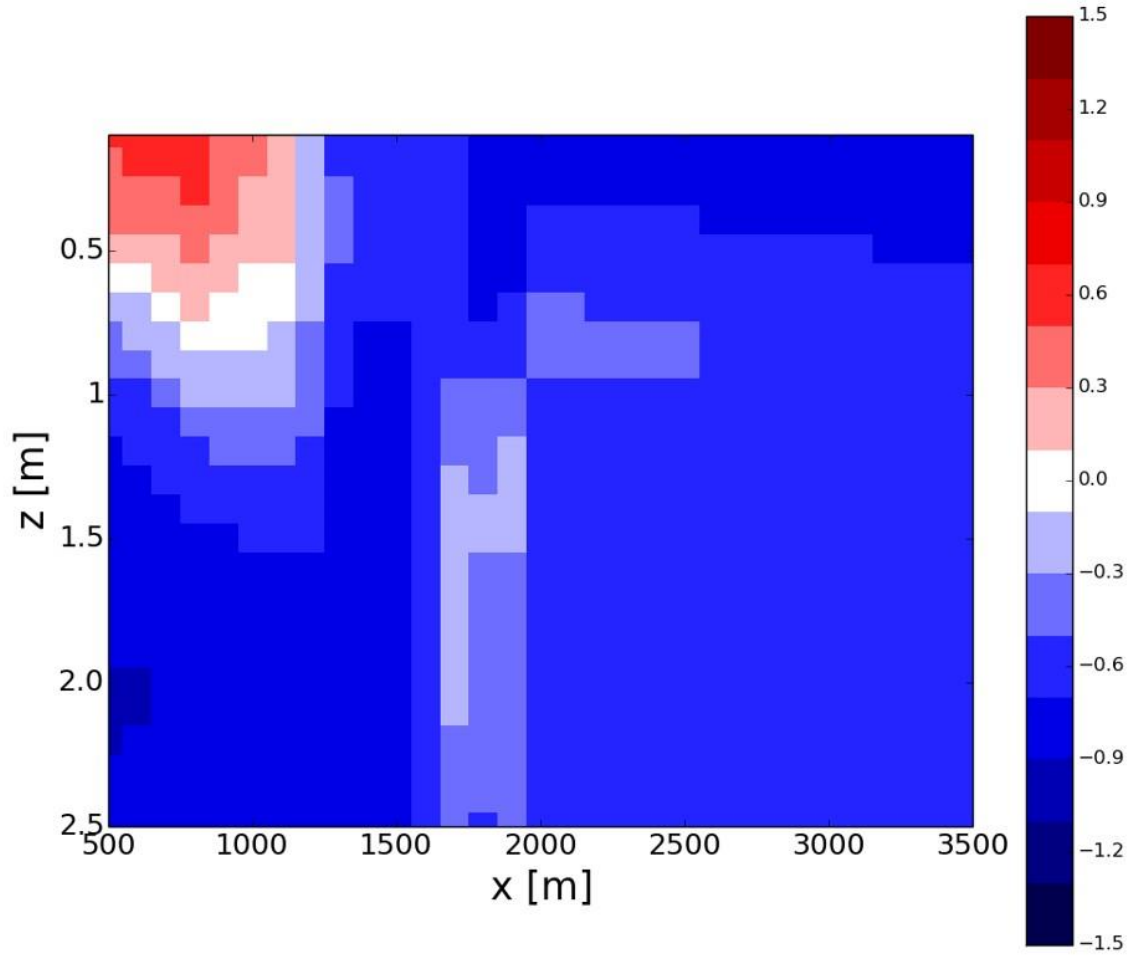

**Figure S5.** The improvement rates of the HIGH\_K-DOWN\_O experiment without a parameter optimization.

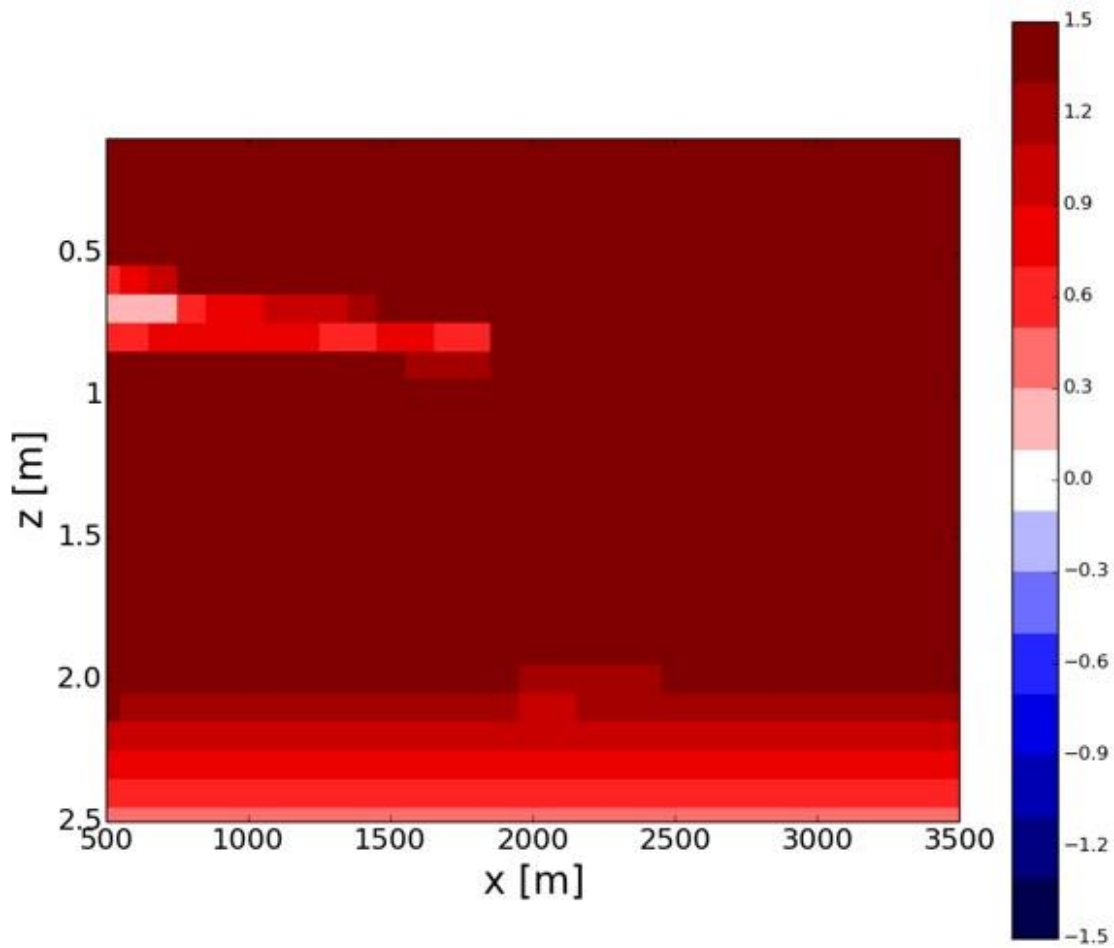

**Figure S6.** The improvement rates of the LOW\_K-DOWN\_O experiment where the topography-driven surface flow is neglected in ParFlow.

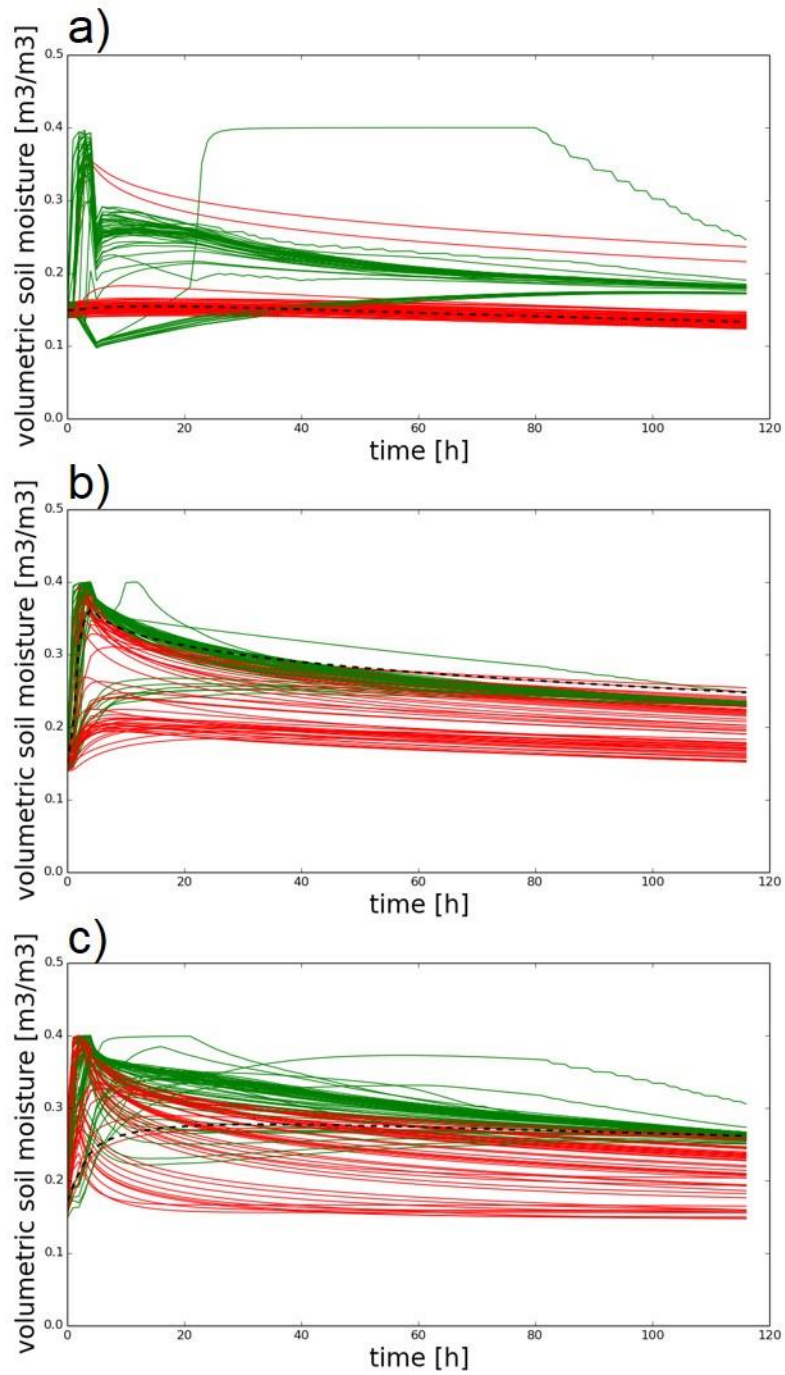

**Figure S7.** Time series of volumetric soil moisture simulated by the synthetic reference run (black dashed line), the OF\_NoDA experiment (red lines), and the OF\_DA\_obs361 experiment (green lines) at a)  $x=200\text{m}$ ,  $y=200\text{m}$ ,  $z=0.15\text{m}$ ; b)  $x=1200\text{m}$ ,  $y=1200\text{m}$ ,  $z=0.15\text{m}$ ; c)  $x=2200\text{m}$ ,  $y=2200\text{m}$ ,  $z=0.15\text{m}$ .
